# Supplementary material for: Integrated analysis of mRNA, microRNA and protein in systemic lupus erythematosus-specific induced pluripotent stem cells from urine
Source: BMC Genomics. 2016 Jul 11;17:488. doi: 10.1186/s12864-016-2809-9 (PMC4940874; doi:10.1186/s12864-016-2809-9)
Supplement: Additional file 2: — Table S2. Differentially expressed microRNA. (XLSX 22 kb) [file 12864_2016_2809_MOESM2_ESM.xlsx]

## Sheet: Sheet1
Table S2 Differentially expressed microRNA
family	miR-name	fold-change(log2 SLE-micRNA/N-micRNA)	p-value
	hsa-miR-139-3p	-4.83618	2.60392e-172
	hsa-miR-573	-4.34644	3.17412e-44
let-7/98/4458/4500	hsa-let-7a-5p	-4.29053	0
miR-25/32/92abc/363/363-3p/367	hsa-miR-92a-2-5p	-4.28042	0
miR-25/32/92abc/363/363-3p/367	hsa-miR-92a-1-5p	-3.54822	0
miR-1268/1268b	hsa-miR-1268b	-3.49904	0
miR-204/204b/211	hsa-miR-204-3p	-3.49203	3.63105e-146
	hsa-miR-1268a	-3.40312	0
	hsa-miR-5010-5p	-3.34309	1.51841e-28
miR-23abc/23b-3p	hsa-miR-23b-5p	-3.19063	1.82438e-189
let-7/98/4458/4500	hsa-let-7b-5p	-3.09711	0
miR-25/32/92abc/363/363-3p/367	hsa-miR-25-5p	-3.06336	0
miR-187	hsa-miR-187-5p	-3.03333	8.72959e-43
	hsa-miR-1250	-2.96106	5.25394e-57
	hsa-miR-4467	-2.94252	5.34181e-43
miR-141/200a	hsa-miR-141-3p	-2.82806	8.79743e-89
	hsa-miR-1323	-2.81918	0
miR-3192	hsa-miR-3192	-2.54678	2.81428e-67
	hsa-miR-371a-5p	-2.53888	0
miR-744/1716	hsa-miR-744-5p	-2.50961	0
miR-221/222/222ab/1928	hsa-miR-222-3p	-2.46639	0
	hsa-miR-323a-3p	-2.43626	0
let-7/98/4458/4500	hsa-let-7e-5p	-2.39296	4.35382e-293
miR-200bc/429/548a	hsa-miR-200c-3p	-2.35699	0
	hsa-miR-330-3p	-2.35372	0
	hsa-miR-1254	-2.34744	5.89073e-57
	hsa-miR-423-5p	-2.31678	0
miR-4433	hsa-miR-4433-3p	-2.31109	1.13398e-29
miR-523	hsa-miR-523-3p	-2.30487	0
miR-379/1193-5p/3529	hsa-miR-3529-5p	-2.30299	1.25749e-37
	hsa-miR-1272	-2.19488	7.03228e-127
	hsa-miR-296-3p	-2.19216	8.93041e-47
miR-122/122a/1352	hsa-miR-122-5p	-2.18945	7.057e-22
miR-193/193b/193a-3p	hsa-miR-193b-5p	-2.15887	1.08928e-169
	hsa-miR-199a-3p	-2.10879	5.63859e-211
	hsa-miR-199b-3p	-2.10879	5.63859e-211
	hsa-miR-3175	-2.05472	1.95834e-14
	hsa-miR-323b-3p	-2.01948	5.74598e-108
	hsa-miR-139-5p	-1.99434	2.01875e-25
miR-148ab-3p/152	hsa-miR-148a-5p	-1.99324	8.19738e-26
	hsa-miR-1287	-1.97642	9.16343e-28
miR-200bc/429/548a	hsa-miR-200b-5p	-1.89379	4.14539e-70
	hsa-miR-1292	-1.89171	6.06992e-46
miR-185/882/3473/4306/4644	hsa-miR-185-3p	-1.88216	5.68083e-37
	hsa-miR-320a	-1.87383	0
miR-130ac/301ab/301b/301b-3p/454/721/4295/3666	hsa-miR-130b-5p	-1.86094	2.526e-31
miR-25/32/92abc/363/363-3p/367	hsa-miR-367-3p	-1.85986	0
miR-760-3p/1842	hsa-miR-760	-1.85272	1.13575e-24
	hsa-miR-3662	-1.73364	1.41045e-13
	hsa-miR-765	-1.73338	5.60021e-13
miR-185/882/3473/4306/4644	hsa-miR-185-5p	-1.71091	0
let-7/98/4458/4500	hsa-let-7c	-1.69752	6.08765e-37
miR-488	hsa-miR-488-5p	-1.69088	2.90348e-17
	hsa-miR-320c	-1.68106	3.11646e-38
	hsa-miR-548k	-1.65234	3.22658e-25
miR-130ac/301ab/301b/301b-3p/454/721/4295/3666	hsa-miR-301a-5p	-1.64904	1.62464e-108
miR-505/505-3p	hsa-miR-505-5p	-1.6296	2.35725e-91
	hsa-miR-95	-1.57935	1.08598e-87
	hsa-miR-372	-1.57703	0
miR-141/200a	hsa-miR-200a-3p	-1.55428	4.5902e-137
	hsa-miR-3934	-1.49523	9.04979e-11
miR-664/664b	hsa-miR-664-5p	-1.48535	3.74424e-45
	hsa-miR-504	-1.47313	1.19956e-106
miR-15abc/16/16abc/195/322/424/497/1907	hsa-miR-16-2-3p	-1.46239	1.23703e-20
	hsa-miR-320b	-1.45945	1.65283e-177
miR-1ab/206/613	hsa-miR-1	-1.45188	0
miR-1307	hsa-miR-1307-3p	-1.37464	0
miR-432	hsa-miR-432-5p	-1.36664	0
miR-200bc/429/548a	hsa-miR-200b-3p	-1.31997	8.93571e-71
miR-221/222/222ab/1928	hsa-miR-221-3p	-1.30718	0
	hsa-miR-543	-1.3065	0
let-7/98/4458/4500	hsa-let-7g-5p	-1.2982	2.11578e-46
	hsa-miR-769-3p	-1.29487	4.16842e-13
miR-873	hsa-miR-873-5p	-1.28585	4.57505e-50
	hsa-miR-331-3p	-1.26959	0
miR-25/32/92abc/363/363-3p/367	hsa-miR-363-5p	-1.25705	0
miR-766	hsa-miR-766-5p	-1.24835	4.90446e-32
miR-676	hsa-miR-676-3p	-1.23211	2.61071e-15
let-7/98/4458/4500	hsa-let-7i-5p	-1.23088	2.06667e-19
	hsa-miR-489	-1.19843	2.251e-08
	hsa-miR-512-3p	-1.18707	6.78169e-47
miR-103a/107/107ab	hsa-miR-107	-1.17003	0
miR-15abc/16/16abc/195/322/424/497/1907	hsa-miR-424-3p	-1.1621	3.46939e-28
miR-516b	hsa-miR-516b-5p	-1.15874	0
	hsa-miR-125a-5p	-1.14998	3.57021e-83
let-7/98/4458/4500	hsa-let-7f-5p	-1.12677	0
miR-551a	hsa-miR-551b-5p	-1.12634	3.75504e-09
miR-181abcd/4262	hsa-miR-181b-5p	-1.11798	4.14574e-116
miR-27abc/27a-3p	hsa-miR-27b-5p	-1.10227	1.24942e-31
miR-1269/1269b	hsa-miR-1269a	-1.09344	6.32657e-21
	hsa-miR-28-3p	-1.06151	8.70648e-113
miR-17/17-5p/20ab/20b-5p/93/106ab/427/518a-3p/519d	hsa-miR-106b-3p	-1.05748	0
miR-873	hsa-miR-873-3p	-1.0335	1.70042e-19
	hsa-miR-128	-1.02554	0
miR-1306/1306-3p	hsa-miR-1306-3p	-1.02097	7.22839e-11
miR-93/93a/105/106a/291a-3p/294/295/302abcde/372/373/428/519a/520be/520acd-3p/1378/1420ac	hsa-miR-373-3p	-1.00286	5.90699e-52
miR-25/32/92abc/363/363-3p/367	hsa-miR-92b-5p	-1.00237	0
	hsa-miR-515-3p	1.00909	5.85464e-43
	hsa-miR-512-5p	1.01189	1.28133e-62
miR-29abcd	hsa-miR-29b-3p	1.03306	3.88544e-53
	hsa-miR-146b-5p	1.04904	1.05745e-166
miR-25/32/92abc/363/363-3p/367	hsa-miR-32-3p	1.05737	8.90284e-07
miR-493/493b	hsa-miR-493-3p	1.07234	1.58977e-18
miR-136	hsa-miR-136-3p	1.07668	2.53798e-09
	hsa-miR-1180	1.07767	1.97379e-29
miR-517ac	hsa-miR-517c-3p	1.08954	9.98655e-11
miR-18ab/4735-3p	hsa-miR-18a-5p	1.10137	2.39844e-194
miR-652	hsa-miR-652-3p	1.11089	1.63089e-31
miR-517ac	hsa-miR-517a-3p	1.11211	7.12818e-200
miR-517b	hsa-miR-517b-3p	1.11211	7.12818e-200
miR-146ac/146b-5p	hsa-miR-146a-5p	1.11638	4.07465e-24
	hsa-miR-496	1.12021	4.87235e-12
	hsa-miR-485-3p	1.1239	1.97626258336499e-323
miR-34ac/34bc-5p/449abc/449c-5p	hsa-miR-34a-3p	1.13386	3.04874e-13
miR-93/93a/105/106a/291a-3p/294/295/302abcde/372/373/428/519a/520be/520acd-3p/1378/1420ac	hsa-miR-302a-3p	1.14383	0
miR-135ab/135a-5p	hsa-miR-135b-5p	1.16786	2.98643e-59
miR-26ab/1297/4465	hsa-miR-26a-5p	1.23057	0
miR-15abc/16/16abc/195/322/424/497/1907	hsa-miR-15b-5p	1.23142	0
miR-17/17-5p/20ab/20b-5p/93/106ab/427/518a-3p/519d	hsa-miR-106a-5p	1.23263	0
miR-15abc/16/16abc/195/322/424/497/1907	hsa-miR-15b-3p	1.26216	8.71874e-43
	hsa-miR-524-5p	1.27813	1.37952e-22
miR-186	hsa-miR-186-3p	1.28238	2.55415e-17
miR-518bcf/518a-3p/518d-3p	hsa-miR-518c-3p	1.28491	6.0814e-55
miR-1307	hsa-miR-1307-5p	1.29351	0
	hsa-miR-484	1.29361	4.01259e-67
	hsa-miR-520a-3p	1.32593	8.40577e-207
miR-1277	hsa-miR-1277-3p	1.33289	2.08915e-16
	hsa-miR-539-3p	1.35678	5.49414e-37
	hsa-miR-20b-5p	1.36108	0
	hsa-miR-455-3p	1.36934	6.95673e-78
miR-519a/519bc-3p/291b-3p/1347	hsa-miR-519a-3p	1.37166	1.20327e-44
miR-21/590-5p	hsa-miR-21-3p	1.38063	3.35838e-29
miR-411	hsa-miR-411-3p	1.39061	9.99479e-39
miR-18ab/4735-3p	hsa-miR-18b-5p	1.40288	4.38191e-94
miR-19ab	hsa-miR-19a-5p	1.40892	2.45306e-09
miR-197	hsa-miR-197-3p	1.43307	3.86129e-55
	hsa-miR-515-5p	1.4336	4.22473e-114
miR-335/335-5p	hsa-miR-335-3p	1.44214	1.0203e-32
	hsa-miR-887	1.45652	1.0749e-170
miR-29abcd	hsa-miR-29c-3p	1.46148	1.50355e-132
	hsa-miR-1260b	1.46356	4.53338e-153
miR-18ab/4735-3p	hsa-miR-18b-3p	1.4761	3.30916e-37
miR-1185/3679-5p	hsa-miR-1185-1-3p	1.47855	5.92974e-28
miR-136	hsa-miR-136-5p	1.49645	1.53185e-53
	hsa-miR-520e	1.5521	1.62608e-23
	hsa-miR-3065-5p	1.56016	6.49644e-20
miR-154/872	hsa-miR-154-5p	1.56053	1.4561e-39
miR-664/664b	hsa-miR-664-3p	1.56097	9.06908e-18
miR-1185/3679-5p	hsa-miR-1185-2-3p	1.57117	2.22503e-17
	hsa-miR-769-5p	1.60473	1.0108e-31
miR-93/93a/105/106a/291a-3p/294/295/302abcde/372/373/428/519a/520be/520acd-3p/1378/1420ac	hsa-miR-302d-3p	1.67285	0
miR-30abcdef/30abe-5p/384-5p	hsa-miR-30a-3p	1.67534	1.70432e-109
	hsa-miR-134	1.68049	0
	hsa-miR-33a-3p	1.69318	2.57831e-14
	hsa-miR-378a-5p	1.70213	4.86742e-12
	hsa-miR-495	1.70937	0
	hsa-miR-363-3p	1.71384	0
	hsa-miR-324-3p	1.71892	1.7945e-11
miR-96/507/1271	hsa-miR-96-5p	1.73243	2.48565e-165
	hsa-miR-342-3p	1.7346	0
	hsa-miR-3187-3p	1.73611	9.91216e-26
	hsa-miR-520g	1.75808	4.48225e-99
miR-93/93a/105/106a/291a-3p/294/295/302abcde/372/373/428/519a/520be/520acd-3p/1378/1420ac	hsa-miR-302b-3p	1.76924	0
miR-25/32/92abc/363/363-3p/367	hsa-miR-92a-3p	1.76944	0
miR-17/17-5p/20ab/20b-5p/93/106ab/427/518a-3p/519d	hsa-miR-93-3p	1.77982	3.6206e-39
	hsa-miR-486-5p	1.78017	0
miR-3676	hsa-miR-3676-3p	1.82486	0
miR-34ac/34bc-5p/449abc/449c-5p	hsa-miR-34a-5p	1.85264	3.07569e-204
	hsa-miR-129-2-3p	1.87408	0
	hsa-miR-590-5p	1.87604	6.65028e-65
	hsa-miR-23b-3p	1.88713	6.62366e-269
	hsa-miR-4454	1.92168	2.68249e-31
	hsa-miR-505-3p	1.9403	3.85856e-54
miR-30abcdef/30abe-5p/384-5p	hsa-miR-30e-3p	1.98117	6.87529e-174
	hsa-miR-520h	1.98727	3.24015e-18
	hsa-miR-378a-3p	2.00083	0
	hsa-miR-520a-5p	2.01114	5.49987e-90
	hsa-miR-188-5p	2.01728	9.84694e-23
	hsa-miR-410	2.02672	1.03569e-202
miR-93/93a/105/106a/291a-3p/294/295/302abcde/372/373/428/519a/520be/520acd-3p/1378/1420ac	hsa-miR-302c-3p	2.04752	0
	hsa-miR-487a	2.05935	2.81858e-88
miR-550a	hsa-miR-550a-3p	2.06869	9.20594e-34
miR-660	hsa-miR-660-5p	2.09375	9.62753e-155
	hsa-miR-598	2.10999	0
	hsa-miR-193a-3p	2.12869	4.73573e-154
	hsa-miR-574-3p	2.13152	2.55253e-73
miR-204/204b/211	hsa-miR-204-5p	2.1364	0
	hsa-miR-324-5p	2.15531	7.81171e-104
	hsa-miR-576-5p	2.15712	8.3785e-46
	hsa-miR-30b-5p	2.16266	8.37442e-55
miR-103a/107/107ab	hsa-miR-103a-2-5p	2.18602	1.05625e-32
miR-93/93a/105/106a/291a-3p/294/295/302abcde/372/373/428/519a/520be/520acd-3p/1378/1420ac	hsa-miR-302b-5p	2.18807	4.36325e-136
	hsa-miR-3065-3p	2.24345	2.94144e-20
miR-19ab	hsa-miR-19b-1-5p	2.27585	1.28228e-21
	hsa-miR-487b	2.27835	0
miR-376abd/376b-3p	hsa-miR-376a-3p	2.32711	0
	hsa-miR-376c	2.34212	0
	hsa-miR-1296	2.3688	5.33465e-28
	hsa-miR-525-5p	2.3775	3.74107e-134
	hsa-miR-135a-5p	2.52119	0
	hsa-miR-376b	2.54346	0
	hsa-miR-654-3p	2.63133	3.5928e-205
miR-31	hsa-miR-31-3p	2.63213	6.7956e-42
miR-625	hsa-miR-625-3p	2.68357	0
miR-19ab	hsa-miR-19b-3p	2.68949	0
miR-526b	hsa-miR-526b-3p	2.78628	5.5153e-97
	hsa-miR-365a-3p	2.80862	5.86385072599946e-317
	hsa-miR-365b-3p	2.80862	5.86385072599946e-317
	hsa-miR-361-5p	2.81549	0
miR-380/380-3p	hsa-miR-380-3p	2.82984	1.5708e-152
miR-337-3p	hsa-miR-337-3p	2.91196	5.48694e-84
	hsa-miR-520f	2.92548	0
miR-556-3p	hsa-miR-556-3p	2.95403	9.66597e-93
	hsa-miR-520b	2.96075	4.42081e-176
	hsa-miR-516a-3p	2.96348	5.55134e-22
miR-516b	hsa-miR-516b-3p	2.96348	5.55134e-22
	hsa-miR-520c-3p	3.08838	0
miR-93/93a/105/106a/291a-3p/294/295/302abcde/372/373/428/519a/520be/520acd-3p/1378/1420ac	hsa-miR-302d-5p	3.09684	0
miR-149	hsa-miR-149-5p	3.19644	2.65338e-45
	hsa-miR-655	3.2405	0
miR-766	hsa-miR-766-3p	3.54262	1.79891e-184
	hsa-miR-1912	3.87427	0
miR-551a	hsa-miR-551b-3p	3.89311	1.71067e-169
	hsa-miR-665	4.51873	1.00626e-38
